# Supplementary material for: Phylogeny, host use, and diversification in the moth family Momphidae (Lepidoptera: Gelechioidea)
Source: PLoS One. 2019 Jun 6;14(6):e0207833. doi: 10.1371/journal.pone.0207833 (PMC6553701; doi:10.1371/journal.pone.0207833)
Supplement: S6 Table — Mean is taken from the 10,000 trees used for the ancestral trait reconstruction. Rows are the starting state and columns are the ending state. (XLSX) [file pone.0207833.s007.xlsx]

## Sheet: S6_Table
S6 Table. Mean Mompha state shifts for hostplant family
	Cistaceae	Haloragaceae	Melastomataceae	Onagraceae	Onagraceae.Lythraceae	Polygonaceae	Rubiaceae	ukn
Cistaceae	NA	0.174	0.748	0.767	0.169	0.189	0.954	0.874
Haloragaceae	0.074	NA	0.199	0.294	0.078	0.098	0.19	0.248
Melastomataceae	0.377	0.183	NA	0.508	0.146	0.191	0.585	0.546
Onagraceae	1.006	0.859	1.303	NA	1.106	0.888	0.91	8.606
Onagraceae.Lythraceae	0.092	0.092	0.195	0.214	NA	0.089	0.194	0.278
Polygonaceae	0.094	0.088	0.191	0.227	0.072	NA	0.203	0.296
Rubiaceae	0.411	0.133	0.53	0.442	0.124	0.13	NA	0.848
ukn	0.69	0.343	0.801	3.979	0.278	0.424	2.824	NA
