# Supplementary material for: Phylogeny, host use, and diversification in the moth family Momphidae (Lepidoptera: Gelechioidea)
Source: PLoS One. 2019 Jun 6;14(6):e0207833. doi: 10.1371/journal.pone.0207833 (PMC6553701; doi:10.1371/journal.pone.0207833)
Supplement: S7 Table — Excel file with known host plant families, host plant species, and larval feeding niches for momphids in this study. (XLSX) [file pone.0207833.s008.xlsx]

## Sheet: host_plant_list
S7 Table. Hostplant database for Momphidae.
species.name	host.plant.species	host.family	feeding.niche
M. capella	Crocanthemum sp.	Cistaceae	fruit borer
M. capella	Helianthemum bicknellii	Cistaceae	fruit borer
M. miscella.1	Helianthemum spp.	Cistaceae	leaf miner
M. miscella.2	Helianthemum spp.	Cistaceae	leaf miner
M. miscella.3	Helianthemum spp.	Cistaceae	leaf miner
M. miscella.4	Helianthemum spp.	Cistaceae	leaf miner
M. sp. bicknellii.leaf.miner.orange	Crocanthemum bicknellii	Cistaceae	leaf miner
Z. sp. Haloragis.leaf.miner	Haloragis erecta	Haloragaceae	leaf miner
M. eloisella	Lythrum salicaria	Lythraceae	stem borer
M. sp. Centradenia.root.gall.CenAmer	Centradenia inaequilateralis	Melastomataceae	root galler
M. sp. Conostegia.apical.gall.CenAmer.1	Conostegia xalapensis	Melastomataceae	stem galler
M. sp. Conostegia.apical.gall.CenAmer.2	Conostegia xalapensis	Melastomataceae	stem galler
M. sp. Miconia.fruit.gall.CenAmer	Miconia lonchophylla	Melastomataceae	fruit galler
M. sp. Monochaetum.fruit.gall.CenAmer	Monochaetum cf. amabile	Melastomataceae	fruit galler
Moriloma pardella	Miconia cf. argentea	Melastomataceae	leaf miner
M. argentimaculella	Oenothera biennis	Onagraceae	leaf miner
M. argentimaculella	Oenothera pilosella	Onagraceae	leaf miner
M. argentimaculella	Oenothera filifolia	Onagraceae	leaf miner
M. brevivittella	Oenothera biennis	Onagraceae	fruit borer
M. circumscriptella	Oenothera capillifolia capillifolia	Onagraceae	fruit borer
M. circumscriptella	Oenothera hartwegii hartwegii	Onagraceae	fruit borer
M. circumscriptella	Oenothera hartwegii pubescens	Onagraceae	fruit borer
M. circumscriptella	Oenothera laciniata	Onagraceae	fruit borer
M. conturbatella.1	Chamerion angustifolium	Onagraceae	shoot tip borer
M. conturbatella.1	Epilobium montanum	Onagraceae	shoot tip borer
M. conturbatella.1	Epilobium angustifolium	Onagraceae	shoot tip borer
M. conturbatella.2	Chamerion angustifolium	Onagraceae	shoot tip borer
M. conturbatella.2	Epilobium montanum	Onagraceae	shoot tip borer
M. conturbatella.2	Epilobium angustifolium	Onagraceae	shoot tip borer
M. definitella	Oenothera caespitosa marginata	Onagraceae	fruit borer
M. definitella	Oenothera caespitosa caespitosa	Onagraceae	fruit borer
M. definitella	Oenothera harringtonii	Onagraceae	fruit borer
M. definitella	Oenothera psammophila	Onagraceae	fruit borer
M. divisella	Epilobium spp.	Onagraceae	stem borer, leaf node gall
M. divisella	Chamerion angustifolium	Onagraceae	stem borer, leaf node gall
M. eloisella	Oenothera biennis	Onagraceae	stem borer
M. epilobiella.1	Epilobium spp.	Onagraceae	shoot tip borer
M. epilobiella.1	Chamerion angustifolium	Onagraceae	shoot tip borer
M. epilobiella.1	Circaea lutetiana	Onagraceae	shoot tip borer
M. epilobiella.2	Epilobium spp.	Onagraceae	shoot tip borer
M. epilobiella.2	Chamerion angustifolium	Onagraceae	shoot tip borer
M. epilobiella.2	Circaea lutetiana	Onagraceae	shoot tip borer
M. idaei	Chamerion angustifolium	Onagraceae	stem and root borer
M. lacteella	Epilobium montanum	Onagraceae	leaf miner
M. langiella	Epilobium spp.	Onagraceae	leaf miner
M. langiella	Chamerion lutetiana	Onagraceae	leaf miner
M. locupletella.EU	Epilobium ciliatum	Onagraceae	leaf miner
M. locupletella.EU	Chamerion angustifolium	Onagraceae	leaf miner
M. locupletella.NA.1	Epilobium ciliatum	Onagraceae	leaf miner
M. locupletella.NA.1	Chamerion angustifolium	Onagraceae	leaf miner
M. locupletella.NA.2	Epilobium ciliatum	Onagraceae	leaf miner
M. locupletella.NA.2	Chamerion angustifolium	Onagraceae	leaf miner
M. murtfeldtella	Oenothera albicaulis	Onagraceae	flower borer
M. murtfeldtella	Oenothera brachycarpa	Onagraceae	flower borer
M. murtfeldtella	Oenothera caespitosa marginata	Onagraceae	flower borer
M. murtfeldtella	Oenothera harringtonii	Onagraceae	flower borer
M. murtfeldtella	Oenothera howardii	Onagraceae	flower borer
M. murtfeldtella	Oenothera laciniata	Onagraceae	flower borer
M. murtfeldtella	Oenothera neomexicana	Onagraceae	flower borer
M. murtfeldtella	Oenothera pilosella	Onagraceae	flower borer
M. murtfeldtella	Camissonia spp.	Onagraceae	flower borer
M. ochraceella	Epilobium hirsutum	Onagraceae	stem and leaf miner
M. pecosella.1	Oenothera capillifolia berlandieri	Onagraceae	flower borer
M. pecosella.1	Oenothera capillifolia capillifolia	Onagraceae	flower borer
M. pecosella.1	Oenothera gayleana	Onagraceae	flower borer
M. pecosella.1	Oenothera hartwegii fendleri	Onagraceae	flower borer
M. pecosella.1	Oenothera hartwegii filifolia	Onagraceae	flower borer
M. pecosella.1	Oenothera hartwegii hartwegii	Onagraceae	flower borer
M. pecosella.1	Oenothera hartwegii pubescens	Onagraceae	flower borer
M. pecosella.1	Oenothera lavandulifolia	Onagraceae	flower borer
M. pecosella.1	Oenothera serrulata	Onagraceae	flower borer
M. pecosella.1	Oenothera tubicula tubicula	Onagraceae	flower borer
M. pecosella.2	Oenothera lavandulifolia	Onagraceae	flower borer
M. pecosella.2	Oenothera pallida	Onagraceae	flower borer
M. pecosella.3	Oenothera toumeyi	Onagraceae	flower borer
M. propinquella	Epilobium spp.	Onagraceae	leaf miner
M. raschkiella	Chamerion angustifolium	Onagraceae	leaf miner
M. rufocristatella	Oenothera capillifolia berlandieri	Onagraceae	stem galler
M. rufocristatella	Oenothera cinerea cinerea	Onagraceae	stem galler
M. rufocristatella	Oenothera filiformis	Onagraceae	stem galler
M. rufocristatella	Oenothera suffrutescens	Onagraceae	stem galler
M. rufocristatella	Gaura spp.	Onagraceae	stem galler
M. sexstrigella	Chamerion angustifolium	Onagraceae	leaf miner
M. sp. caespitosa.flower.borer.WY	Oenothera caespitosa caespitosa	Onagraceae	flower borer
M. sp. caespitosa.flower.borer.WY	Oenothera caespitosa macroglottis	Onagraceae	flower borer
M. sp. Calylophus.stem.gall.KS	Oenothera capillifolia berlandieri	Onagraceae	stem galler
M. sp. Calylophus.stem.gall.KS	Oenothera serrulata	Onagraceae	stem galler
M. sp. Camissonia.flower.borer.CA.1	Camissonia cheiranthifolia	Onagraceae	flower borer
M. sp. Camissonia.flower.borer.CA.2	Camissonia cheiranthifolia	Onagraceae	flower borer
M. sp. Guara.flower.borer.AZ	Oenothera suffrutescens	Onagraceae	flower borer
M. sp. sct.Anogora.flower.borer.CA	Oenothera californica avita	Onagraceae	flower borer
M. sp. sct.Anogora.flower.borer.CA	Oenothera deltoides deltoides	Onagraceae	flower borer
M. stellella	Oenothera biennis	Onagraceae	flower borer
M. stellella	Oenothera villosa	Onagraceae	flower borer
M. stellella	Oenothera villosa strigosa	Onagraceae	flower borer
M. sturnipennella.1	Chamerion angustifolium	Onagraceae	stem borer w/ gall; fruit borer
M. sturnipennella.2	Chamerion angustifolium	Onagraceae	stem borer w/ gall; fruit borer
M. subbistrigella	Epilobium montanum	Onagraceae	fruit borer
M. terminella.CAN	Circaea spp.	Onagraceae	leaf miner
M. terminella.EU	Circaea spp.	Onagraceae	leaf miner
Z. calliphana	Muehlenbeckia complexa	Polygonaceae	leaf miner
M. cephalonthiella	Cephalanthus occidentalis	Rubiaceae	leaf miner
M. solomoni	Cephalanthus occidentalis	Rubiaceae	shoot tip borer; leaf miner
M. sp. Galium.leaf.miner.MA	Galium asprellum	Rubiaceae	leaf miner
M. sp. Galium.leaf.miner.OK	Galium sp.	Rubiaceae	leaf miner
M. sp. Hamelia.leaf.miner.CenAmer	Hamelia patens	Rubiaceae	leaf miner
M. sp. Psychotria.leaf.miner.CenAmer	Psychotria valeriana	Rubiaceae	leaf miner
